# Supplementary material
Source: PubMed Central journal article supplement (PMC7080390)

## Supplemental Material

### Suitability of Elderly Adult Hospital Readmission Rates for Profiling Readmissions in Younger Adult and Pediatric Populations

**Authors:** Emily M. Bucholz, Sara L. Toomey, Neel M. Butala, Alyna T. Chien, Robert W. Yeh, Mark A. Schuster

#### Table of Contents

|                                                                                                                                                                                                                       |   |
|-----------------------------------------------------------------------------------------------------------------------------------------------------------------------------------------------------------------------|---|
| <b>Table S1.</b> Pearson correlation coefficients and weighted Cohen Kappa's statistics for correlation between age-specific RSRRs with RSRRs calculated in patients age $\geq 70$ years as a reference category..... | 2 |
| <b>Table S2.</b> Sensitivity analyses.....                                                                                                                                                                            | 3 |
| <b>Figure S1.</b> Study approach to defining the sample and analyzing the data.....                                                                                                                                   | 5 |
| <b>Figure S2.</b> Hospital selection diagram for the <i>adult</i> sample (n=1760) and the <i>pediatric/adult</i> sample (n=235).....                                                                                  | 6 |
| <b>Figure S3.</b> Distribution of hospitals by <b>A)</b> percentage of patients <65 years-old in the <i>adult</i> cohort and <b>B)</b> percentage of patients <18 years-old in the <i>adult/pediatric</i> cohort..... | 7 |
| <b>Figure S4.</b> Association of <b>A)</b> pediatric (1-17 years), <b>B)</b> young adult (18-39 years), and <b>C)</b> middle-aged adult (40-64 years) RSRRs with elderly adult ( $\geq 65$ years) RSRRs.....          | 8 |
| <b>Figure S5.</b> Association of RSRRs for age deciles compared with RSRRs for patients aged $\geq 70$ years.....                                                                                                     | 9 |

**Table S1.** Pearson correlation coefficients and weighted Cohen Kappa's statistics for correlation between age-specific RSRRs with RSRRs calculated in patients age  $\geq 70$  years as a reference category

|                                             | <b>Pediatric Patients Aged 1-9 years<sup>a</sup></b> | <b>Pediatric Patients Aged 10-19 years<sup>a</sup></b> | <b>Adult Patients Aged 20-29 years</b> | <b>Adult Patients Aged 30-39 years</b> | <b>Adult Patients Aged 40-49 years</b> | <b>Adult Patients Aged 50-59 years</b> | <b>Adult Patients Aged 60-69 years</b> |
|---------------------------------------------|------------------------------------------------------|--------------------------------------------------------|----------------------------------------|----------------------------------------|----------------------------------------|----------------------------------------|----------------------------------------|
| Median (IQR) RSRR <sup>b</sup>              | 5.8% (5.1, 6.9)                                      | 7.2% (6.5, 8.2)                                        | 9.3% (9.0, 9.8)                        | 9.8% (9.4, 10.4)                       | 10.2% (9.6, 10.8)                      | 11.1% (10.4, 12.0)                     | 11.7% (11.0, 12.5)                     |
| Pearson coefficient R <sup>2</sup> (95% CI) | 0.07 (-0.06, 0.20)                                   | 0.11 (-0.02, 0.24)                                     | 0.26 (0.21, 0.30)                      | 0.36 (0.32, 0.40)                      | 0.45 (0.42, 0.49)                      | 0.60 (0.57, 0.63)                      | 0.64 (0.61, 0.66)                      |
| Weighted Cohen's Kappa coefficient (95% CI) | 0.04 (-0.06, 0.13)                                   | 0.09 (0.00, 0.19)                                      | 0.14 (0.11, 0.17)                      | 0.20 (0.16, 0.23)                      | 0.30 (0.26, 0.33)                      | 0.40 (0.37, 0.43)                      | 0.45 (0.42, 0.48)                      |

Abbreviations: CI, confidence interval; IQR, interquartile range; RSRR, risk-standardized readmission rate.

<sup>a</sup>Comparisons between RSRRs for patients aged 1-9 years and 10-19 years with RSRRs for patients aged  $\geq 70$  years performed in subset of 287 hospitals treating adult and pediatric patients.

<sup>b</sup>Median (IQR) RSRR for elderly adult patients was 13.6% (12.3, 15.0) for cohort of 235 hospitals and 13.3% (12.2, 14.4) for full cohort of 1760 hospitals.

**Table S2.** Sensitivity analyses. Pearson correlation coefficients and weighted Cohen Kappa's statistics for correlation between pediatric, young adult, and middle-aged adult RSRRs with elderly adult RSRRs

|                                                                                         | <b>Pediatric (1-17 years) vs. Elderly Adults (≥65 years) RSRRs</b> | <b>Young Adults (18-39 years) vs. Elderly Adults (≥65 years) RSRRs</b> | <b>Middle-aged Adults (40-64 years) vs. Elderly Adults (≥65 years) RSRRs</b> |
|-----------------------------------------------------------------------------------------|--------------------------------------------------------------------|------------------------------------------------------------------------|------------------------------------------------------------------------------|
| <b>Analyses repeated in pediatric-adult cohort</b>                                      |                                                                    |                                                                        |                                                                              |
| Sample size                                                                             | 235                                                                | 235                                                                    | 235                                                                          |
| Median (IQR) RSRR <sup>a</sup>                                                          | 6.2% (5.4, 7.6)                                                    | 10.1% (9.1, 11.1)                                                      | 11.5% (10.2, 12.9)                                                           |
| Pearson coefficient R <sup>2</sup> (95% CI)                                             | 0.10 (-0.03, 0.23)                                                 | 0.60 (0.51, 0.67)                                                      | 0.83 (0.79, 0.87)                                                            |
| Weighted Cohen's Kappa coefficient (95% CI)                                             | 0.04 (-0.05, 0.13)                                                 | 0.34 (0.26, 0.42)                                                      | 0.62 (0.56, 0.69)                                                            |
| <b>Analyses repeated with pediatric risk-adjustment algorithm only</b>                  |                                                                    |                                                                        |                                                                              |
| Sample size                                                                             | 235                                                                | 1760                                                                   | 1760                                                                         |
| Median (IQR) RSRR                                                                       | 6.2% (5.4, 7.6) <sup>b</sup>                                       | 9.5% (8.9, 10.3) <sup>c</sup>                                          | 11.0% (9.9, 12.2) <sup>c</sup>                                               |
| Pearson coefficient R <sup>2</sup> (95% CI)                                             | 0.07 (-0.06, 0.19)                                                 | 0.41 (0.37, 0.45)                                                      | 0.69 (0.66, 0.71)                                                            |
| Weighted Cohen's Kappa coefficient (95% CI)                                             | 0.01 (-0.08, 0.10)                                                 | 0.25 (0.21, 0.28)                                                      | 0.49 (0.47, 0.52)                                                            |
| <b>Analyses repeated including specialty hospitals</b>                                  |                                                                    |                                                                        |                                                                              |
| Sample size                                                                             | 282                                                                | 1817                                                                   | 1817                                                                         |
| Median (IQR) RSRR                                                                       | 6.1% (5.4, 7.2) <sup>d</sup>                                       | 9.5% (9.0, 10.1) <sup>e</sup>                                          | 10.9% (10.1, 11.9) <sup>e</sup>                                              |
| Pearson coefficient R <sup>2</sup> (95% CI)                                             | 0.15 (3.6, 26.5)                                                   | 0.41 (0.37, 0.44)                                                      | 0.70 (0.67, 0.72)                                                            |
| Weighted Cohen's Kappa coefficient (95% CI)                                             | 0.10 (0.02, 0.19)                                                  | 0.23 (0.20, 0.26)                                                      | 0.47 (0.44, 0.50)                                                            |
| <b>Analyses repeated using 2013 Nationwide Readmissions Database</b>                    |                                                                    |                                                                        |                                                                              |
| Sample size                                                                             | 268                                                                | 1722                                                                   | 1722                                                                         |
| Median (IQR) RSRR                                                                       | 6.1% (5.1, 7.5) <sup>f</sup>                                       | 9.3% (8.8, 9.9) <sup>g</sup>                                           | 10.8% (10.0, 11.8) <sup>g</sup>                                              |
| Pearson coefficient R <sup>2</sup> (95% CI)                                             | 0.22 (0.11, 0.33)                                                  | 0.36 (0.32, 0.40)                                                      | 0.65 (0.62, 0.68)                                                            |
| Weighted Cohen's Kappa coefficient (95% CI)                                             | 0.09 (0.00, 0.18)                                                  | 0.23 (0.19, 0.26)                                                      | 0.47 (0.44, 0.50)                                                            |
| <b>Analyses repeated limited to index admissions for primary infections<sup>h</sup></b> |                                                                    |                                                                        |                                                                              |
| Sample size                                                                             | --                                                                 | 1225                                                                   | 1225                                                                         |
| Median (IQR) RSRR                                                                       | --                                                                 | 8.0% (7.6, 8.6) <sup>i</sup>                                           | 12.6 (11.8, 13.6) <sup>i</sup>                                               |
| Pearson coefficient R <sup>2</sup> (95% CI)                                             | --                                                                 | 0.29 (0.24, 0.34)                                                      | 0.47 (0.43, 0.51)                                                            |
| Weighted Cohen's Kappa coefficient (95% CI)                                             | --                                                                 | 0.19 (0.15, 0.23)                                                      | 0.30 (0.26, 0.34)                                                            |

Abbreviations: CI, confidence interval; IQR, interquartile range; RSRR, risk-standardized readmission rate.

<sup>a</sup>Median RSRR (IQR) for elderly adult patients with adult algorithm is 13.2% (12.0, 14.7) in the *pediatric/adult* sample (n=235).

<sup>b</sup>Median RSRR (IQR) for elderly adult patients with the pediatric algorithm is 13.4% (11.8, 15.2) in the *pediatric/adult* sample (n=235).

<sup>c</sup>Median RSRR (IQR) for elderly adult patients with the pediatric algorithm is 13.0% (11.7, 14.5) in the *adult* sample (n=1760).

<sup>d</sup>Median RSRR (IQR) for elderly adult patients with the adult algorithm with specialty hospitals included is 13.0% (11.9, 14.5) in the *pediatric/adult* sample (n=282).

<sup>e</sup>Median RSRR (IQR) for elderly adults patients with the adult algorithm with specialty hospitals included is 12.9% (11.9, 14.1) in the *adult* sample (n=1817).

<sup>f</sup>Median RSRR (IQR) for elderly adult patients with the adult algorithm in 2013 is 13.3% (12.0, 14.8) in the *pediatric/adult* sample (n=268).

<sup>g</sup>Median RSRR (IQR) for elderly adult patients with the adult algorithm in 2013 is 12.9% (11.9, 14.3) in the *adult* sample (n=1722).

<sup>h</sup>Infections include sepsis, bacteremia, viral infections, CNS infections, pericarditis/myocarditis, pneumonia, influenza, upper respiratory infections, urinary tract infections, and skin/soft tissue infections.

<sup>i</sup>Median RSRR (IQR) for elderly adult patients with infectious primary discharge diagnoses using the adult algorithm is 14.6% (13.7, 15.5) in the *adult* sample (n=1225).

**Figure S1.** Study approach to defining the sample and analyzing the data

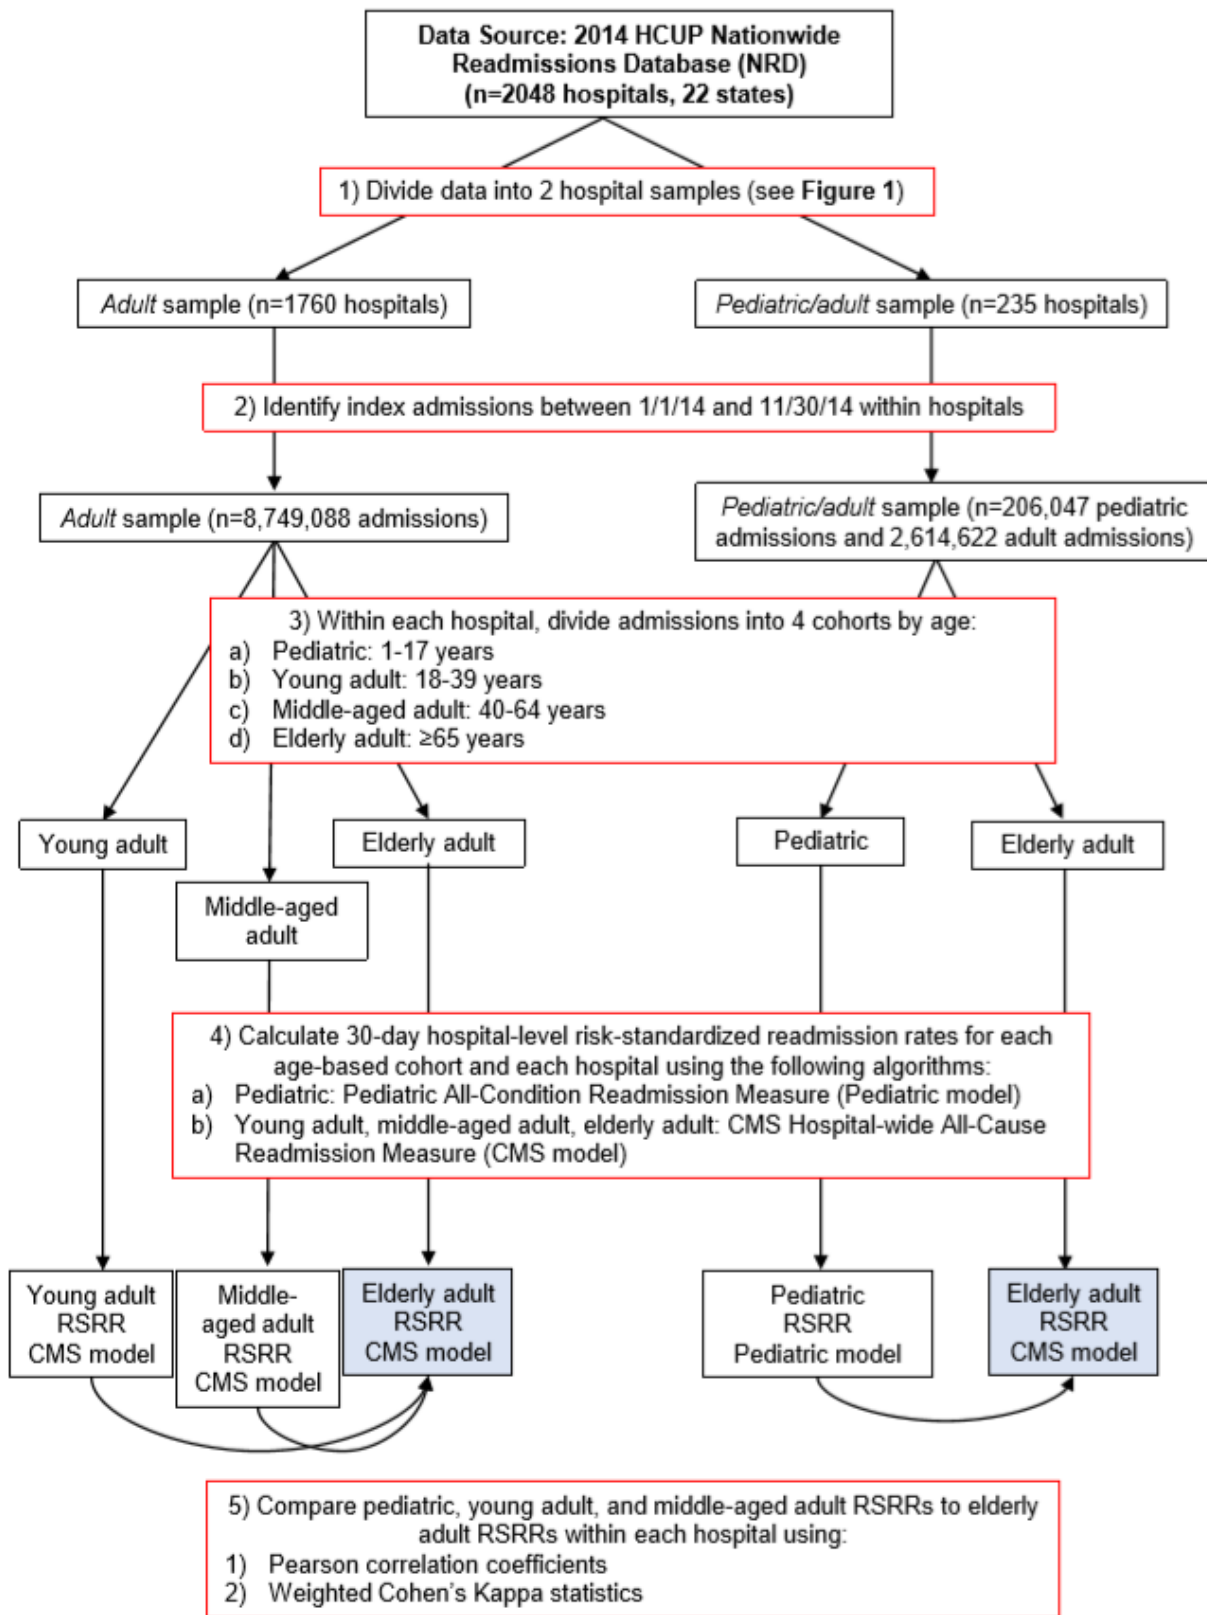

**Figure S2.** Hospital selection diagram for the *adult* sample (n=1760) and the *pediatric/adult* sample (n=235)

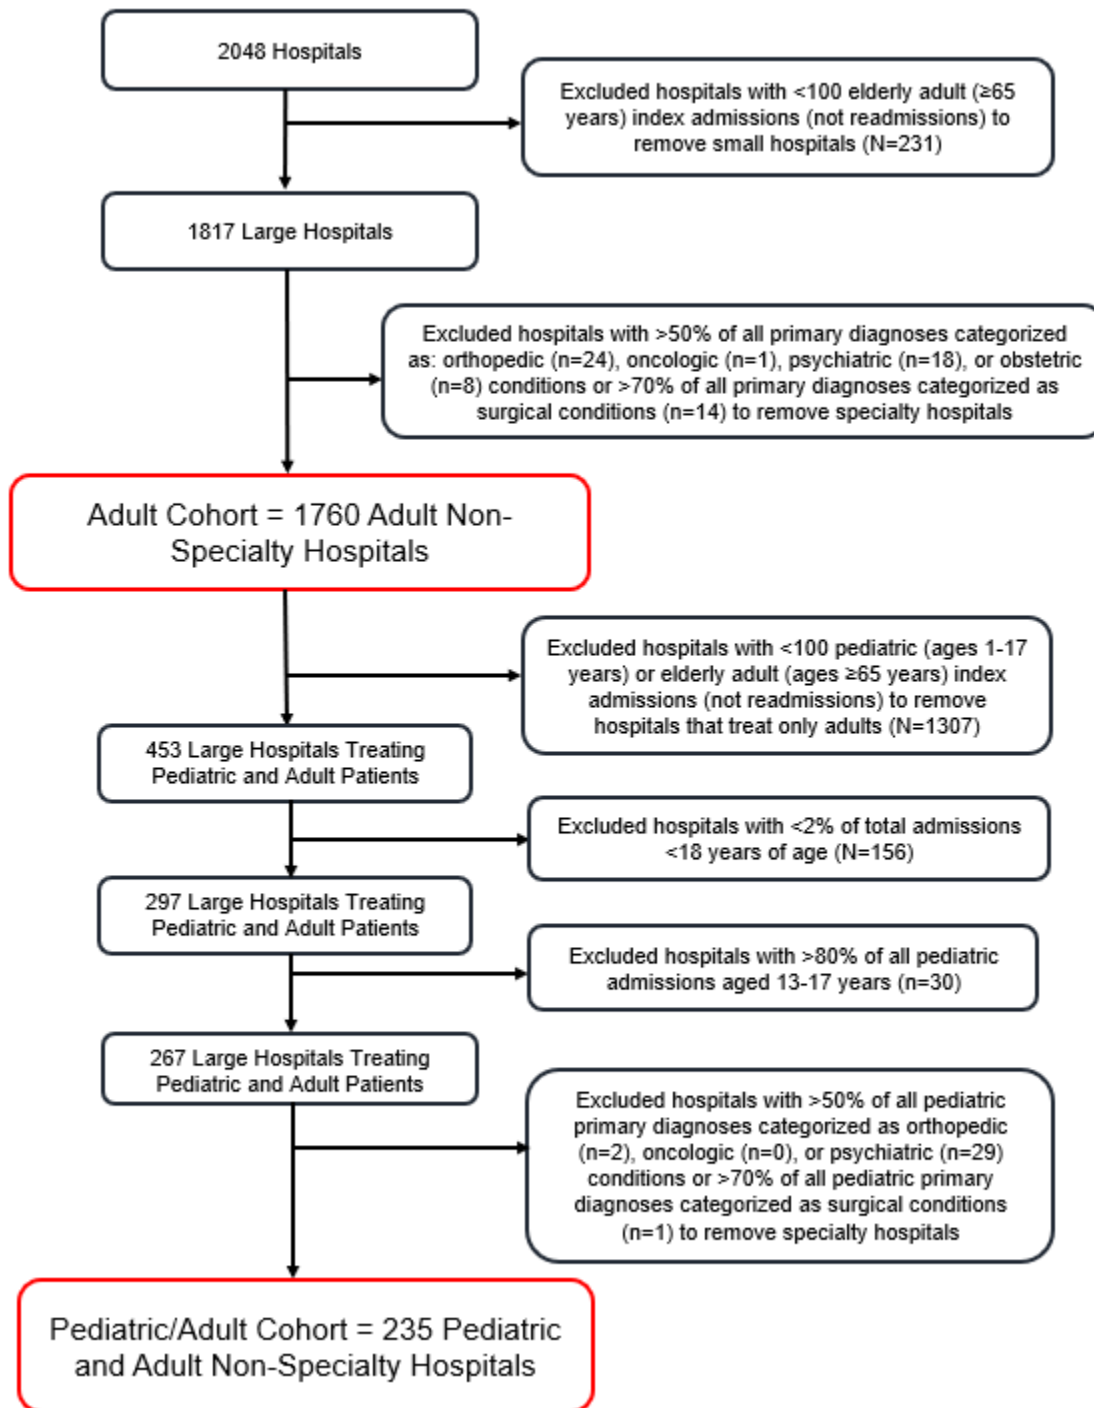

**Figure S3.** Distribution of hospitals by **A)** percentage of patients <65 years-old in the *adult* cohort and **B)** percentage of patients <18 years-old in the *adult/pediatric* cohort

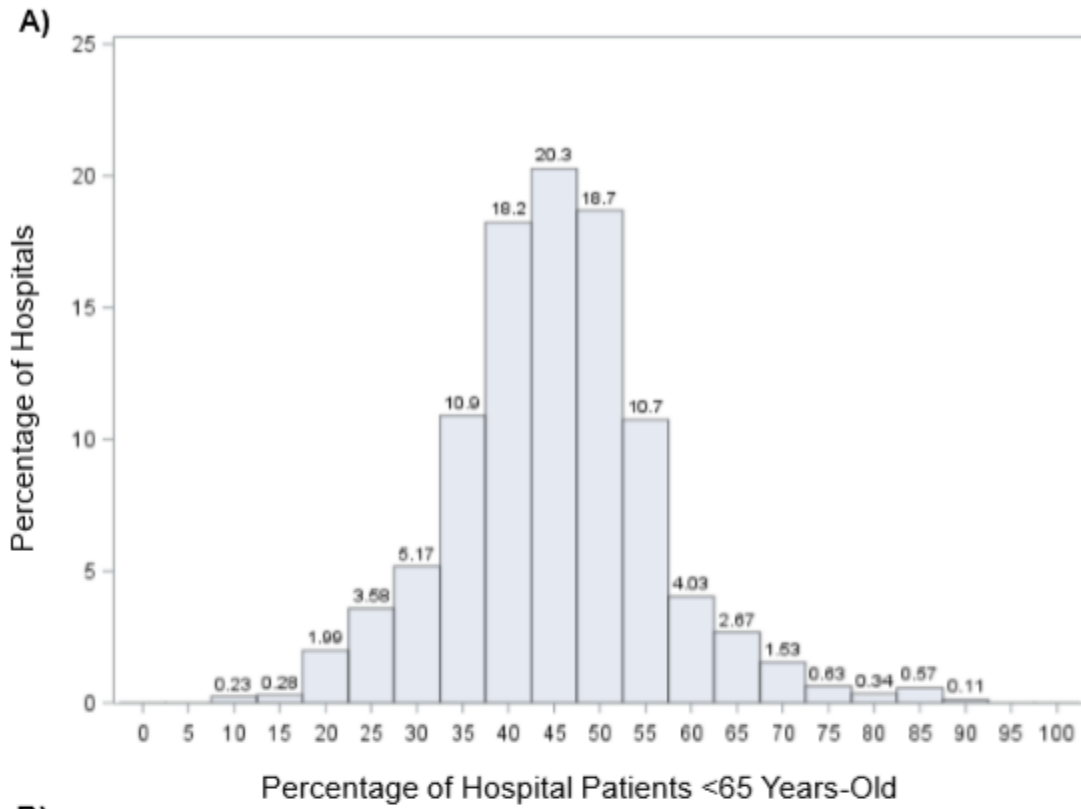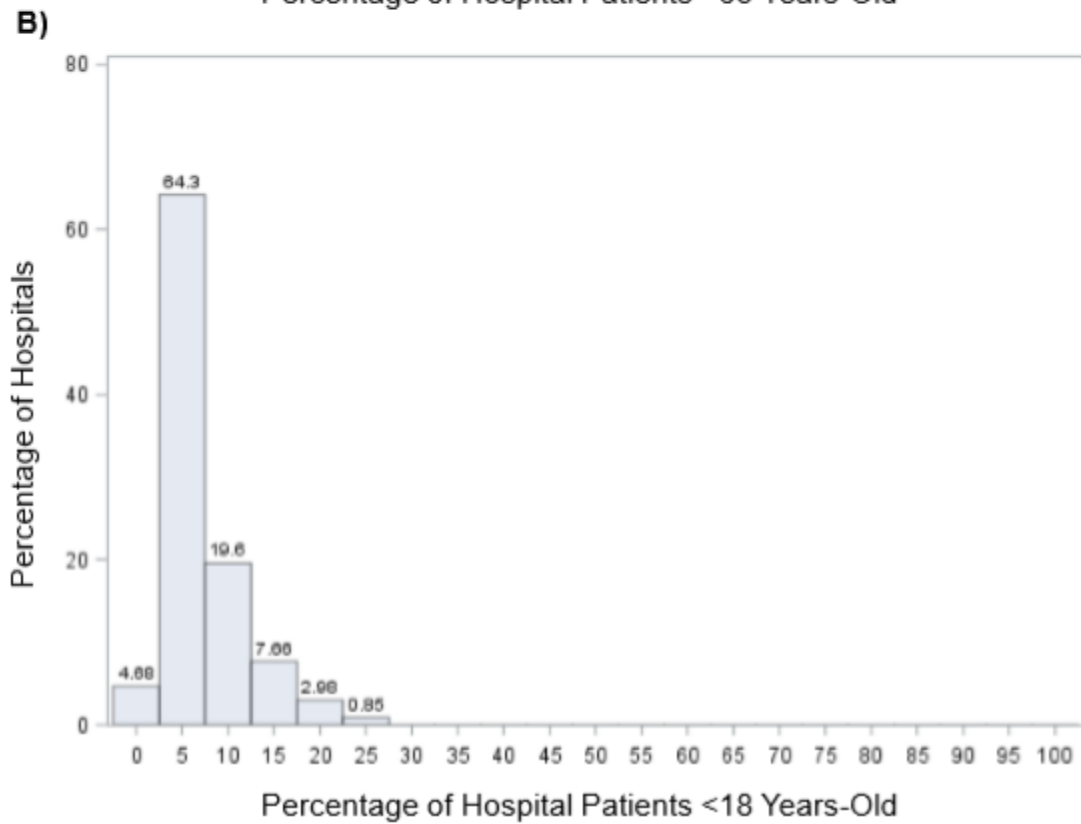

**Figure S4.** Association of **A)** pediatric (1-17 years), **B)** young adult (18-39 years), and **C)** middle-aged adult (40-64 years) RSRRs with elderly adult ( $\geq 65$  years) RSRRs. Comparisons between pediatric and elderly adult RSRRs performed in pediatric/adult cohort (n=287 hospitals). All other comparisons were performed in adult cohort (n=1760 hospitals).

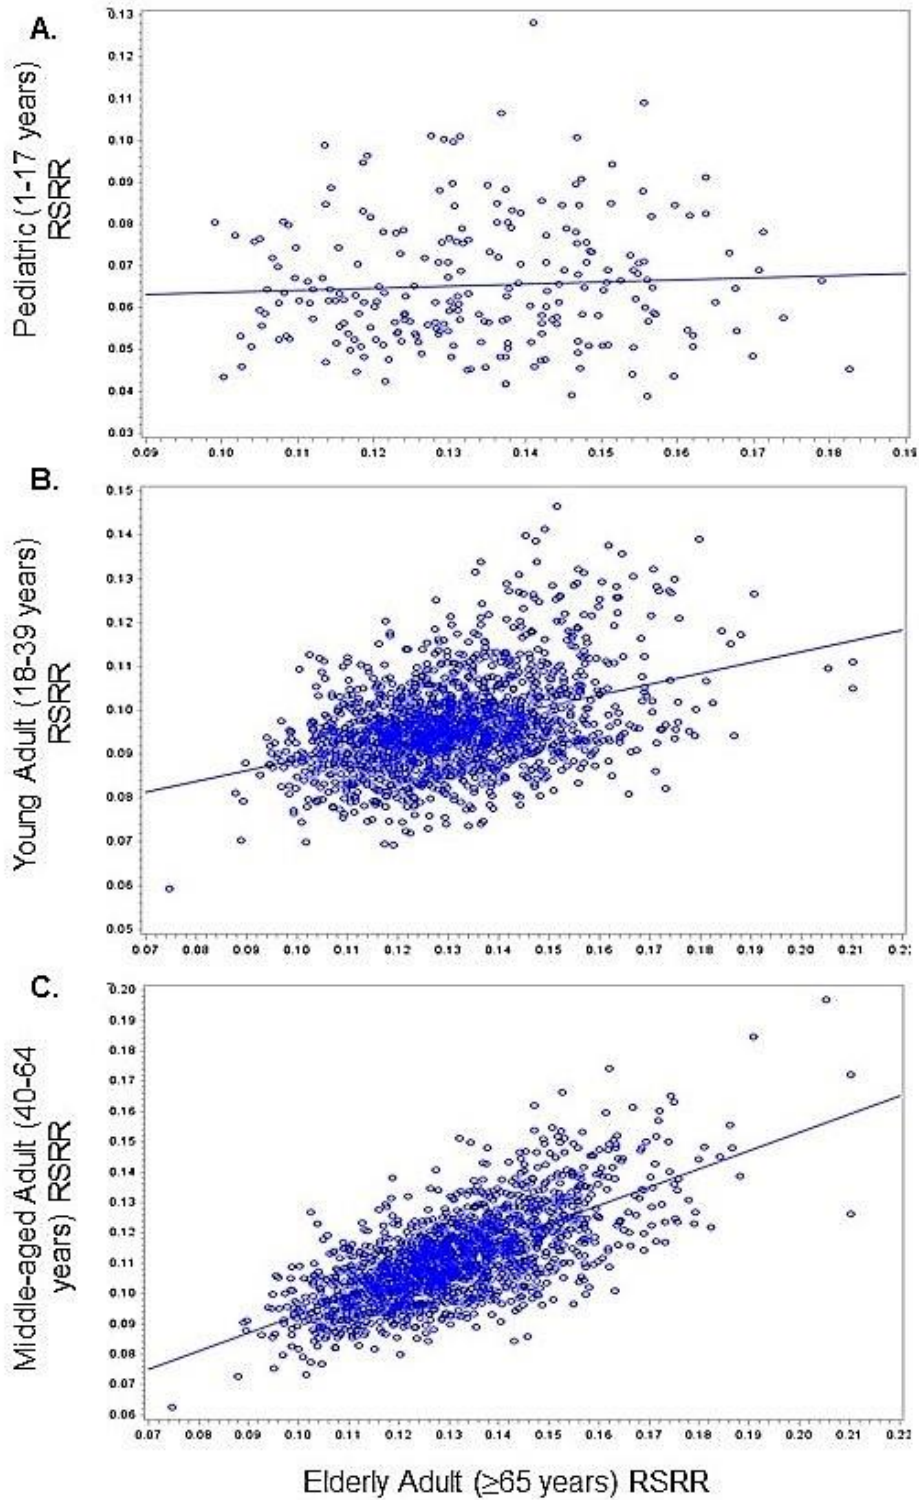



**Figure S5.** Association of RSRRs for age deciles compared with RSRRs for patients aged  $\geq 70$  years. Comparisons between RSRRs for patients aged 1-9 years and 10-19 years with RSRRs for patients aged  $\geq 70$  years performed in pediatric/adult cohort (n=235 hospital). All other comparisons were performed in adult cohort (n=1760 hospitals).

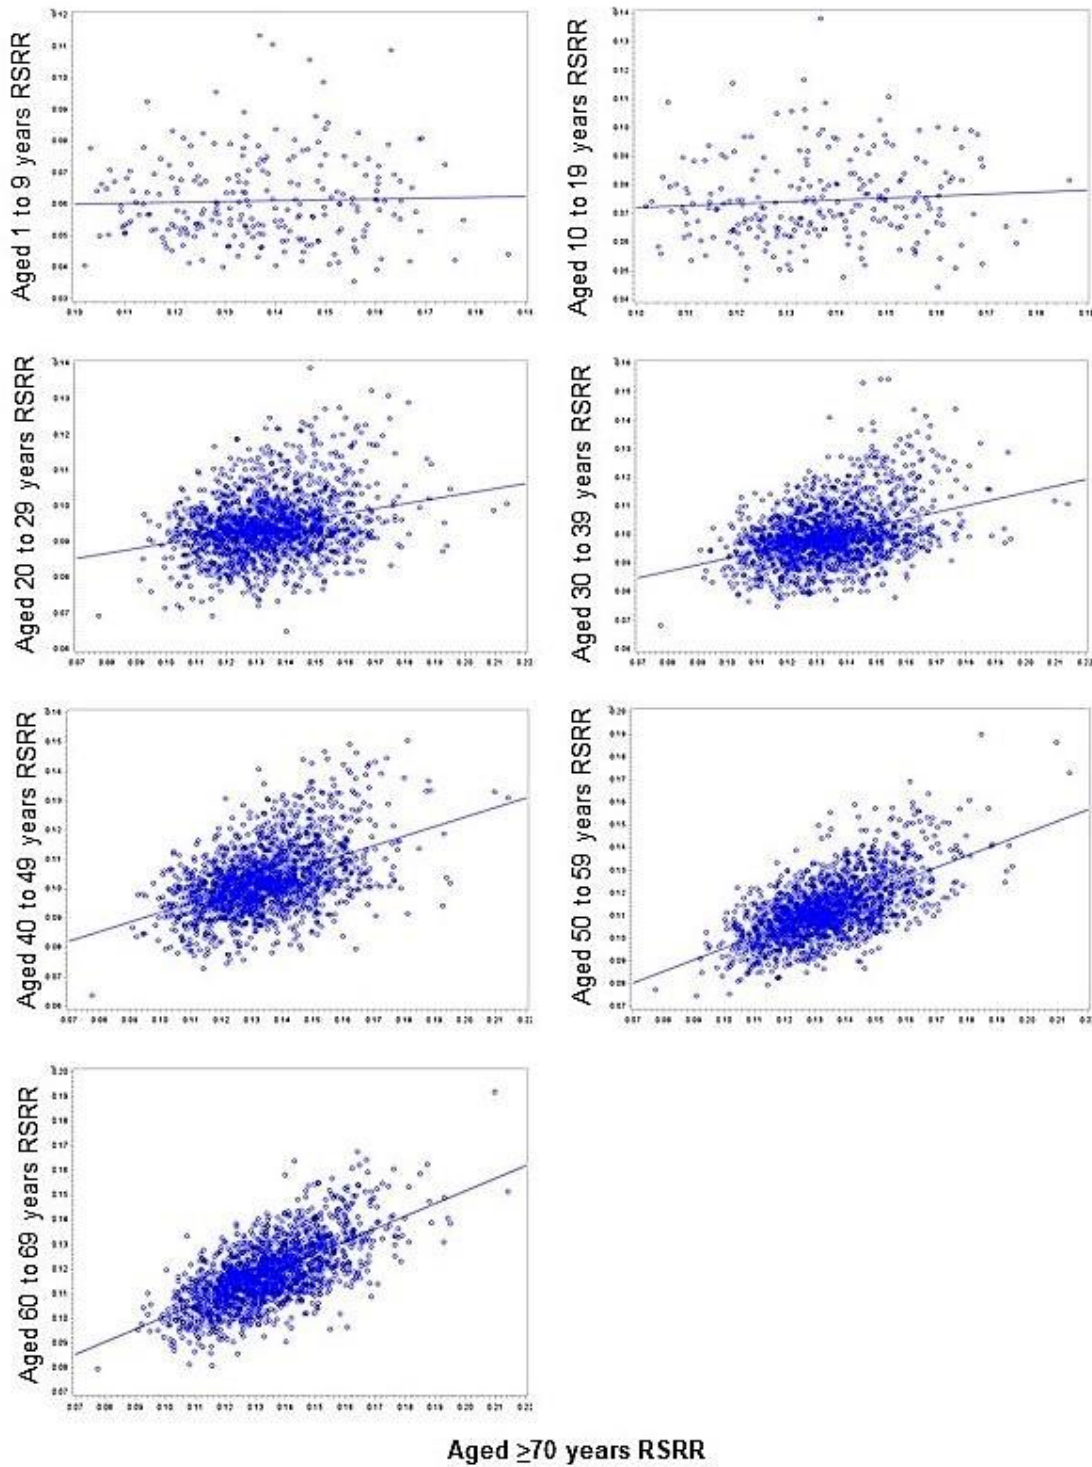

Supplement: HESR-55-277-s002.pdf [file HESR-55-277-s002.pdf]
